# Supplementary material for: Association of State-Level Medicaid Expansion With Treatment of Patients With Higher-Risk Prostate Cancer
Source: PubMed Central journal article supplement (PMC7542300; doi:10.1001/jamanetworkopen.2020.15198), 2020-10-07
Supplement: jamanetwopen-e2015198-s001.pdf [file jamanetwopen-e2015198-s001.pdf]

## Supplemental Online Content

Liu W, Goodman M, Filson CP. Association of state-level Medicaid expansion with treatment of patients with higher-risk prostate cancer. *JAMA Netw Open*. 2020;3(10):e2015198. doi:10.1001/jamanetworkopen.2020.15198

**eAppendix.** Regression Model to Assess Trends Over Time

**eFigure.** Generation of Analytic Cohort

**eTable.** Association With Additional Factors and Treatment of Men With High-Risk Prostate Cancer

This supplemental material has been provided by the authors to give readers additional information about their work.

## eAppendix. Regression Model to Assess Trends Over Time

$$Y = \beta_0 + \beta_1 \text{expand} + \beta_2 \text{pre-time} + \beta_3 \text{post-time} + \beta_4 \text{expand*pre-time} + \beta_5 \text{expand*post-time}$$

where  $\beta_0$  is the intercept, *expand* is the variable indicating the expansion (vs. non-expansion) status; *pre-time* and *post-time* are slopes before and after 2014, and *expand\*pre-time* and *expand\*post-time* are interaction terms reflecting the difference in slopes between expansion and non-expansion states. The analysis initially compared trends in states with and without Medicaid expansion (i.e., slopes  $\beta_{\text{expand}}$  and  $\beta_{\text{noexpand}}$ ). The slope over time for each group was then estimated before and after the intervention ( $\Delta_{\text{pre-2014 or post-2014}} = \beta_{\text{expand}} - \beta_{\text{noexpand}}$ ). Finally, the difference-in-differences of slopes before and after the intervention was calculated ( $\Delta_{\text{overall}} = \Delta_{\text{pre-2014}} - \Delta_{\text{post-2014}}$ ).

**eFigure. Generation of Analytic Cohort**

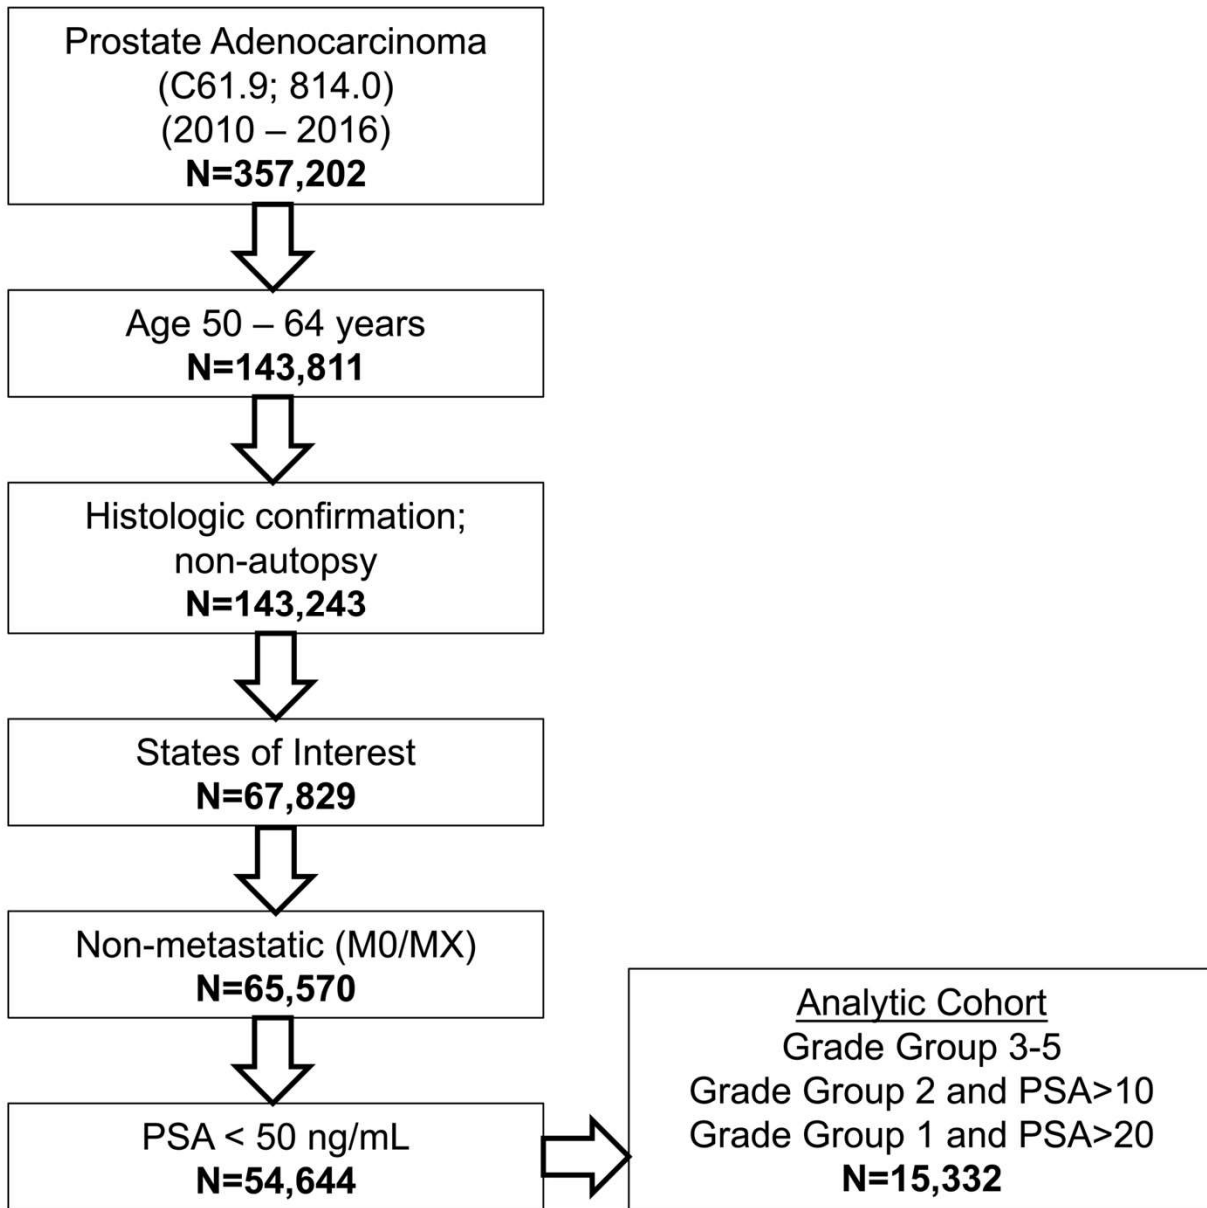

**eTable. Association With Additional Factors and Treatment of Men With High-Risk Prostate Cancer**

| Covariate                  | Received Treatment<br>(n=13,210) | No Treatment<br>(n=2,122) | p     |
|----------------------------|----------------------------------|---------------------------|-------|
| Age (years) (mean, SD)     | 59.1 (3.8)                       | 59.2 (3.8)                | .055  |
| Year of Diagnosis          |                                  |                           | .042  |
| 2010                       | 1,767 (84.8)                     | 318 (15.3)                |       |
| 2011                       | 1,842 (86.9)                     | 278 (13.1)                |       |
| 2012                       | 1,772 (87.1)                     | 262 (12.9)                |       |
| 2013                       | 1,778 (85.0)                     | 314 (15.0)                |       |
| 2014                       | 1,834 (85.8)                     | 304 (14.2)                |       |
| 2015                       | 2,028 (87.6)                     | 286 (12.4)                |       |
| 2016                       | 2,189 (85.9)                     | 360 (14.1)                |       |
| State                      |                                  |                           | <.001 |
| <i>Hawaii</i>              | 434 (86.8)                       | 66 (13.2)                 |       |
| <i>Iowa</i>                | 1,465 (91.9)                     | 130 (8.2)                 |       |
| <i>New Mexico</i>          | 453 (79.8)                       | 115 (20.3)                |       |
| <i>Utah</i>                | 767 (89.3)                       | 92 (10.7)                 |       |
| <i>Georgia</i>             | 3,631 (83.4)                     | 721 (16.6)                |       |
| <i>Kentucky</i>            | 1,388 (87.8)                     | 193 (12.2)                |       |
| <i>Louisiana</i>           | 1,908 (82.6)                     | 402 (17.4)                |       |
| <i>New Jersey</i>          | 3,164 (88.7)                     | 403 (11.3)                |       |
| Marital Status             |                                  |                           | <.001 |
| Single                     | 1,785 (82.5)                     | 379 (17.5)                |       |
| Married/Domestic Partner   | 8,606 (90.3)                     | 923 (9.7)                 |       |
| Separated/Divorced/Widowed | 1,632 (86.1)                     | 262 (13.8)                |       |
| Missing                    | 1,187 (68.0)                     | 558 (32.0)                |       |
| Tumor Stage <sup>a</sup>   |                                  |                           | .001  |
| T1                         | 7,576 (84.7)                     | 1,360 (15.2)              |       |
| T2                         | 3,547 (86.5)                     | 553 (13.5)                |       |
| T3-T4                      | 309 (80.3)                       | 76 (19.7)                 |       |
| PSA (ng/mL)                |                                  |                           | <.001 |
| <10.0                      | 7,184 (89.2)                     | 871 (10.8)                |       |
| 10.0 – 19.9                | 4,003 (85.4)                     | 686 (14.6)                |       |
| 20.0+                      | 2,023 (78.2)                     | 565 (21.8)                |       |
| Gleason Score on Biopsy    |                                  |                           | <.001 |
| 3+3=6 (GG1)                | 321 (68.2)                       | 150 (31.9)                |       |
| 3+4=7 (GG2)                | 2,292 (85.1)                     | 402 (14.9)                |       |
| 4+3=7 (GG3)                | 5,366 (88.2)                     | 719 (11.8)                |       |
| 4+4=8 or greater (GG4-5)   | 5,231 (86.1)                     | 851 (14.0)                |       |

<sup>a</sup>Missing in 1,911 cases.
